# Supplementary material
Source: PubMed Central journal article supplement (PMC5479062)
Supplement: NIHMS866353-supplement-Supplementary_Online_Content.pdf [file NIHMS866353-supplement-Supplementary_Online_Content.pdf]

## Supplementary Online Content

King KS, Kozlitina J, Rosenberg RN, Peshock RM, McColl RW, Garcia CK. Effect of leukocyte telomere length on total and regional brain volumes in a large population-based cohort. Published online August 4, 2014. *JAMA Neurol*. doi:10.1001/jamaneurol.2014.1926

**eTable 1.** Association of Subsegmental Brain Region Size with Telomere Length Stratified by Gender

**eTable 2.** Association of Subsegmental Brain Region Size with Telomere Length Stratified by Age Group

**eTable 3.** Association of Subsegmental Brain Region Size with Telomere Length after Adjustment for Additional Covariates

**eTable 4.** Association of Subsegmental Brain Region Size With Telomere Length after Adjustment for *APOE* Genotype in Addition to Other Covariates

This supplementary material has been provided by the authors to give readers additional information about their work.

**eTable 1. Association of Subsegmental Brain Region Size With Telomere Length stratified by Gender<sup>a</sup>**

| Brain Region | Subsegmental Region    | Men (n=807)       |             |                        | Women (n=1,153) |             |                        | P-value for interaction |      |
|--------------|------------------------|-------------------|-------------|------------------------|-----------------|-------------|------------------------|-------------------------|------|
|              |                        | Beta (SE)         | P-value     | Partial R <sup>2</sup> | Beta (SE)       | P-value     | Partial R <sup>2</sup> |                         |      |
| Frontal      | Pars Opercularis       | 0.08 (0.03)       | 0.06        | 0.84                   | 0.06 (0.02)     | 0.04        | 0.53                   | 0.40                    |      |
|              | Medial Orbito-Frontal  | 0.07 (0.03)       | 0.08        | 0.62                   | 0.07 (0.03)     | 0.02        | 0.69                   | 0.93                    |      |
|              | Lateral Orbito-Frontal | 0.11 (0.03)       | <0.001      | 2.11                   | 0.04 (0.02)     | 0.09        | 0.34                   | 0.03                    |      |
|              | Paracentral Lobule     | 0.07 (0.03)       | 0.09        | 0.58                   | 0.05 (0.03)     | 0.07        | 0.38                   | 0.63                    |      |
|              | Pars Orbitalis         | 0.06 (0.03)       | 0.11        | 0.50                   | 0.04 (0.03)     | 0.15        | 0.24                   | 0.56                    |      |
|              | Precentral             | 0.03 (0.03)       | 0.39        | 0.16                   | 0.06 (0.02)     | 0.03        | 0.57                   | 0.87                    |      |
|              | Superior Frontal       | 0.03 (0.03)       | 0.36        | 0.20                   | 0.04 (0.02)     | 0.11        | 0.31                   | 0.92                    |      |
|              | Rostral Middle Frontal | -0.01 (0.03)      | 0.91        | 0.01                   | 0.06 (0.02)     | 0.02        | 0.73                   | 0.09                    |      |
|              | Frontal Pole           | 0.02 (0.03)       | 0.73        | 0.04                   | 0.03 (0.03)     | 0.42        | 0.08                   | NA                      |      |
|              | Caudal Middle Frontal  | 0.04 (0.03)       | 0.39        | 0.17                   | 0.00 (0.02)     | 0.87        | 0.00                   | NA                      |      |
|              | Pars Triangularis      | 0.04 (0.03)       | 0.26        | 0.27                   | -0.02 (0.03)    | 0.46        | 0.06                   | NA                      |      |
|              | Parietal               | Precuneus         | 0.11 (0.03) | <0.001                 | 2.15            | 0.08 (0.02) | 0.002                  | 1.20                    | 0.38 |
|              |                        | Inferior Parietal | 0.05 (0.03) | 0.12                   | 0.46            | 0.10 (0.02) | <0.001                 | 1.43                    | 0.40 |

|           |                                      |             |        |      |                 |       |      |      |
|-----------|--------------------------------------|-------------|--------|------|-----------------|-------|------|------|
|           | Posterior Central                    | 0.07 (0.03) | 0.06   | 0.73 | 0.08<br>(0.02)  | 0.006 | 1.00 | 0.73 |
|           | Superior Parietal                    | 0.10 (0.03) | 0.005  | 1.47 | 0.04<br>(0.02)  | 0.15  | 0.24 | 0.12 |
|           | Supramarginal                        | 0.01 (0.03) | 0.83   | 0.02 | 0.05<br>(0.02)  | 0.07  | 0.39 | NA   |
| Temporal  | Hippocampus                          | 0.07 (0.03) | 0.06   | 0.74 | 0.09<br>(0.03)  | 0.006 | 0.95 | 0.65 |
|           | Amygdala                             | 0.10 (0.03) | 0.01   | 1.22 | 0.06<br>(0.03)  | 0.05  | 0.47 | 0.20 |
|           | Inferior Temporal                    | 0.11 (0.03) | <0.001 | 1.93 | 0.05<br>(0.02)  | 0.07  | 0.38 | 0.02 |
|           | Fusiform                             | 0.11 (0.03) | 0.002  | 1.69 | 0.04<br>(0.02)  | 0.18  | 0.20 | 0.04 |
|           | Superior Temporal                    | 0.04 (0.03) | 0.25   | 0.29 | 0.06<br>(0.02)  | 0.03  | 0.59 | 0.93 |
|           | Transverse Temporal                  | 0.03 (0.03) | 0.50   | 0.11 | 0.07<br>(0.02)  | 0.03  | 0.63 | 0.24 |
|           | Middle Temporal                      | 0.05 (0.03) | 0.11   | 0.49 | 0.04<br>(0.02)  | 0.15  | 0.25 | 0.22 |
|           | Bank Sup Temp<br>Sulcus <sup>b</sup> | 0.01 (0.03) | 0.92   | 0.01 | 0.06<br>(0.03)  | 0.05  | 0.48 | NA   |
|           | Entorhinal cortex                    | 0.06 (0.03) | 0.16   | 0.4  | 0.02<br>(0.03)  | 0.52  | 0.05 | NA   |
|           | Parahippocampal<br>gyrus             | 0.04 (0.03) | 0.39   | 0.16 | 0.01<br>(0.03)  | 0.71  | 0.01 | NA   |
|           | Temporal Pole                        | 0.06 (0.03) | 0.16   | 0.38 | -0.02<br>(0.03) | 0.65  | 0.02 | NA   |
| Occipital | Lateral Occipital                    | 0.07 (0.03) | 0.06   | 0.73 | 0.03<br>(0.02)  | 0.24  | 0.16 | 0.13 |

|                |                      |                 |      |      |                |        |      |       |
|----------------|----------------------|-----------------|------|------|----------------|--------|------|-------|
|                | Cuneus Cortex        | 0.00 (0.03)     | 0.96 | 0.00 | 0.02<br>(0.03) | 0.55   | 0.04 | NA    |
|                | Pericalcarine        | 0.02 (0.03)     | 0.69 | 0.05 | 0 (0.03)       | 0.87   | 0.00 | NA    |
|                | Lingual              | -0.01<br>(0.03) | 0.93 | 0.01 | 0.02<br>(0.03) | 0.46   | 0.06 | NA    |
| Insular cortex |                      | 0.06 (0.03)     | 0.07 | 0.7  | 0.05<br>(0.02) | 0.07   | 0.42 | 0.53  |
| Cingulate      | Posterior Cingulate  | 0.07 (0.03)     | 0.06 | 0.82 | 0.08<br>(0.02) | 0.006  | 0.95 | 0.99  |
|                | Rostral Anterior     | 0.07 (0.03)     | 0.08 | 0.65 | 0.05<br>(0.02) | 0.07   | 0.38 | 0.58  |
|                | Caudal Anterior      | 0.03 (0.03)     | 0.57 | 0.08 | 0.07<br>(0.03) | 0.03   | 0.56 | 0.31  |
|                | Isthmus of Cingulate | 0.06 (0.03)     | 0.10 | 0.53 | 0.04<br>(0.02) | 0.22   | 0.18 | 0.42  |
| Deep Nuclei    | Thalamus             | 0.06 (0.03)     | 0.09 | 0.58 | 0.1 (0.02)     | <0.001 | 2.05 | 0.50  |
|                | Ventral Diencephalon | 0.02 (0.03)     | 0.55 | 0.09 | 0.1 (0.02)     | <0.001 | 1.59 | 0.08  |
|                | Caudate              | 0.06 (0.03)     | 0.10 | 0.53 | 0.03<br>(0.03) | 0.32   | 0.11 | 0.21  |
|                | Nucleus Accumbens    | 0.04 (0.03)     | 0.38 | 0.19 | 0.04<br>(0.03) | 0.22   | 0.17 | NA    |
|                | Putamen              | 0.03 (0.03)     | 0.50 | 0.11 | 0.03<br>(0.02) | 0.25   | 0.14 | NA    |
|                | Pallidum             | 0.00 (0.03)     | 0.99 | 0.00 | 0.05<br>(0.03) | 0.11   | 0.30 | NA    |
| Cerebellum     | White Matter         | 0 (0.03)        | 0.95 | 0.00 | 0.09<br>(0.03) | 0.006  | 0.92 | 0.11  |
|                | Cortex               | 0.00 (0.03)     | 0.95 | 0.00 | 0.04<br>(0.03) | 0.15   | 0.25 | NA    |
| Cerebrum       | White Matter         | 0.00 (0.02)     | 0.95 | 0.00 | 0.07           | <0.001 | 1.69 | 0.009 |

|                            |        |                 |        |      |                 |      |      |      |
|----------------------------|--------|-----------------|--------|------|-----------------|------|------|------|
|                            |        |                 |        |      | (0.02)          |      |      |      |
|                            | Cortex | 0.10 (0.02)     | <0.001 | 1.94 | 0.06<br>(0.02)  | 0.03 | 0.59 | 0.04 |
| Inferior Lateral Ventricle |        | -0.04<br>(0.03) | 0.39   | 0.17 | -0.07<br>(0.03) | 0.05 | 0.49 | 0.75 |
| Lateral Ventricle          |        | -0.02<br>(0.03) | 0.62   | 0.06 | -0.03<br>(0.03) | 0.25 | 0.15 | NA   |

Abbreviation: NA, not applicable.

<sup>a</sup>Covariates in the multivariable model include age, sex, race/ethnicity, telomere length, and total cranial volume. The effect size of telomere length (beta) is reported as the mean difference in each regional brain size associated with a 1-SD unit difference in telomere length. *P* values for telomere length have been corrected for multiple comparisons. *P* values for interaction are reported for those regions that were associated with telomere length in the combined cohort.

<sup>b</sup>FreeSurfer (<http://surfer.nmr.mgh.harvard.edu/>) term for the banks of the superior temporal sulcus.

**eTable 2. Association of Subsegmental Brain Region Size With Telomere Length stratified by Age Group<sup>a</sup>**

| Brain Region | Subsegmental Region    | Age ≤50 years (n=1,013) |             |                        | Age >50 years (n=947) |             |                        | P-value for interaction |      |
|--------------|------------------------|-------------------------|-------------|------------------------|-----------------------|-------------|------------------------|-------------------------|------|
|              |                        | Beta (SE)               | P-value     | Partial R <sup>2</sup> | Beta (SE)             | P-value     | Partial R <sup>2</sup> |                         |      |
| Frontal      | Pars Opercularis       | 0.08 (0.03)             | 0.03        | 0.92                   | 0.06 (0.03)           | 0.08        | 0.48                   | 0.65                    |      |
|              | Medial Orbito-Frontal  | 0.06 (0.03)             | 0.06        | 0.53                   | 0.08 (0.03)           | 0.02        | 0.86                   | 0.74                    |      |
|              | Lateral Orbito-Frontal | 0.06 (0.02)             | 0.03        | 0.80                   | 0.08 (0.02)           | 0.005       | 1.17                   | 0.67                    |      |
|              | Paracentral Lobule     | 0.05 (0.03)             | 0.15        | 0.32                   | 0.07 (0.03)           | 0.04        | 0.65                   | 0.53                    |      |
|              | Pars Orbitalis         | 0.03 (0.03)             | 0.39        | 0.11                   | 0.08 (0.03)           | 0.02        | 0.81                   | 0.27                    |      |
|              | Precentral             | 0.05 (0.02)             | 0.06        | 0.50                   | 0.04 (0.03)           | 0.17        | 0.26                   | 0.94                    |      |
|              | Superior Frontal       | 0.06 (0.02)             | 0.03        | 0.67                   | 0.02 (0.02)           | 0.49        | 0.07                   | 0.26                    |      |
|              | Rostral Middle Frontal | 0.01 (0.02)             | 0.84        | 0.01                   | 0.07 (0.03)           | 0.02        | 0.79                   | 0.12                    |      |
|              | Frontal Pole           | 0.05 (0.03)             | 0.24        | 0.21                   | 0.00 (0.03)           | 0.97        | 0.00                   | NA                      |      |
|              | Caudal Middle Frontal  | 0.07 (0.03)             | 0.03        | 0.69                   | -0.03 (0.03)          | 0.38        | 0.11                   | NA                      |      |
|              | Pars Triangularis      | 0.00 (0.03)             | 0.89        | 0.00                   | 0.01 (0.03)           | 0.70        | 0.02                   | NA                      |      |
|              | Parietal               | Precuneus               | 0.08 (0.02) | 0.01                   | 1.37                  | 0.10 (0.02) | <0.001                 | 1.81                    | 0.57 |

|          |                                      |             |      |      |                |        |      |       |
|----------|--------------------------------------|-------------|------|------|----------------|--------|------|-------|
|          | Inferior Parietal                    | 0.02 (0.02) | 0.51 | 0.07 | 0.13<br>(0.03) | <0.001 | 2.7  | 0.001 |
|          | Posterior Central                    | 0.06 (0.02) | 0.05 | 0.59 | 0.09<br>(0.03) | 0.005  | 1.19 | 0.35  |
|          | Superior Parietal                    | 0.01 (0.02) | 0.71 | 0.02 | 0.11<br>(0.03) | <0.001 | 1.78 | 0.004 |
|          | Supramarginal                        | 0.02 (0.02) | 0.39 | 0.11 | 0.04<br>(0.03) | 0.17   | 0.26 | NA    |
| Temporal | Hippocampus                          | 0.05 (0.02) | 0.07 | 0.48 | 0.10<br>(0.03) | 0.004  | 1.27 | 0.04  |
|          | Amygdala                             | 0.08 (0.03) | 0.03 | 0.80 | 0.07<br>(0.03) | 0.04   | 0.64 | 0.60  |
|          | Inferior Temporal                    | 0.06 (0.02) | 0.03 | 0.80 | 0.07<br>(0.02) | 0.01   | 0.94 | 0.73  |
|          | Fusiform                             | 0.03 (0.02) | 0.31 | 0.15 | 0.09<br>(0.03) | 0.002  | 1.43 | 0.03  |
|          | Superior Temporal                    | 0.05 (0.02) | 0.07 | 0.46 | 0.05<br>(0.02) | 0.10   | 0.41 | 0.77  |
|          | Transverse Temporal                  | 0.06 (0.03) | 0.05 | 0.56 | 0.04<br>(0.03) | 0.19   | 0.24 | 0.66  |
|          | Middle Temporal                      | 0.04 (0.02) | 0.14 | 0.34 | 0.04<br>(0.02) | 0.13   | 0.34 | 0.85  |
|          | Bank Sup Temp<br>Sulcus <sup>b</sup> | 0.01 (0.03) | 0.87 | 0.00 | 0.07<br>(0.03) | 0.05   | 0.58 | NA    |
|          | Entorhinal cortex                    | 0.01 (0.03) | 0.70 | 0.03 | 0.05<br>(0.03) | 0.15   | 0.3  | NA    |
|          | Parahippocampal gyrus                | 0.00 (0.03) | 0.95 | 0.00 | 0.04<br>(0.03) | 0.21   | 0.22 | NA    |
|          | Temporal Pole                        | 0.02 (0.03) | 0.69 | 0.03 | 0.02<br>(0.03) | 0.55   | 0.05 | NA    |

|                |                      |              |      |      |                 |       |      |      |
|----------------|----------------------|--------------|------|------|-----------------|-------|------|------|
| Occipital      | Lateral Occipital    | 0.04 (0.02)  | 0.17 | 0.29 | 0.05<br>(0.03)  | 0.10  | 0.39 | 0.76 |
|                | Cuneus Cortex        | -0.01 (0.03) | 0.84 | 0.01 | 0.03<br>(0.03)  | 0.31  | 0.14 | NA   |
|                | Pericalcarine        | -0.01 (0.03) | 0.71 | 0.02 | 0.04<br>(0.03)  | 0.26  | 0.17 | NA   |
|                | Lingual              | -0.02 (0.03) | 0.56 | 0.06 | 0.04<br>(0.03)  | 0.24  | 0.19 | NA   |
| Insular cortex |                      | 0.05 (0.02)  | 0.06 | 0.54 | 0.06<br>(0.02)  | 0.04  | 0.64 | 0.79 |
| Cingulate      | Posterior Cingulate  | 0.07 (0.02)  | 0.03 | 0.77 | 0.09<br>(0.03)  | 0.005 | 1.16 | 0.80 |
|                | Rostral Anterior     | 0.07 (0.03)  | 0.03 | 0.78 | 0.05<br>(0.03)  | 0.10  | 0.41 | 0.55 |
|                | Caudal Anterior      | 0.03 (0.03)  | 0.34 | 0.13 | 0.07<br>(0.03)  | 0.04  | 0.65 | 0.39 |
|                | Isthmus of Cingulate | 0.03 (0.02)  | 0.29 | 0.18 | 0.05<br>(0.03)  | 0.10  | 0.41 | 0.69 |
| Deep Nuclei    | Thalamus             | 0.07 (0.02)  | 0.02 | 1.15 | 0.08<br>(0.02)  | 0.003 | 1.32 | 0.70 |
|                | Ventral Diencephalon | 0.07 (0.02)  | 0.02 | 0.99 | 0.05<br>(0.02)  | 0.10  | 0.42 | 0.58 |
|                | Caudate              | 0.03 (0.03)  | 0.30 | 0.17 | 0.05<br>(0.03)  | 0.13  | 0.33 | 0.98 |
|                | Nucleus Accumbens    | 0.05 (0.03)  | 0.20 | 0.25 | 0.03<br>(0.03)  | 0.43  | 0.09 | NA   |
|                | Putamen              | 0.07 (0.02)  | 0.03 | 0.71 | -0.01<br>(0.03) | 0.67  | 0.03 | NA   |
|                | Pallidum             | 0.04 (0.03)  | 0.19 | 0.27 | 0.01<br>(0.03)  | 0.86  | 0.00 | NA   |



|                                  |              |              |      |      |                 |       |      |      |
|----------------------------------|--------------|--------------|------|------|-----------------|-------|------|------|
| Cerebellum                       | White Matter | 0.04 (0.03)  | 0.21 | 0.24 | 0.06<br>(0.03)  | 0.12  | 0.35 | 0.32 |
|                                  | Cortex       | 0.03 (0.02)  | 0.39 | 0.11 | 0.03<br>(0.03)  | 0.42  | 0.09 | NA   |
| Cerebrum                         | White Matter | 0.03 (0.02)  | 0.06 | 0.54 | 0.04<br>(0.02)  | 0.07  | 0.50 | 0.26 |
|                                  | Cortex       | 0.05 (0.02)  | 0.03 | 0.74 | 0.1 (0.03)      | 0.001 | 1.60 | 0.16 |
| Inferior<br>Lateral<br>Ventricle |              | -0.05 (0.03) | 0.17 | 0.30 | -0.05<br>(0.03) | 0.15  | 0.29 | 0.50 |
| Lateral<br>Ventricle             |              | -0.04 (0.03) | 0.31 | 0.16 | -0.02<br>(0.03) | 0.59  | 0.04 | NA   |

Abbreviation: NA, not applicable.

<sup>a</sup>Covariates in the multivariable models include age, sex, race/ethnicity, telomere length and total cranial volume. The effect size of telomere (beta) is reported as the mean difference in each regional brain size associated with a 1-SD unit difference in telomere length. *P* values for telomere length have been corrected for multiple comparisons. *P* values for interaction are reported for those regions that were associated with telomere length in the combined cohort.

<sup>b</sup>FreeSurfer (<http://surfer.nmr.mgh.harvard.edu/>) term for the banks of the superior temporal sulcus.

**eTable 3. Association of Subsegmental Brain Region Size with Telomere Length After Adjustment for Additional Covariates<sup>a</sup>**

| Brain Region      | Subsegmental Region               | Model (n=1915)    |             |                        |      |
|-------------------|-----------------------------------|-------------------|-------------|------------------------|------|
|                   |                                   | Beta (SE)         | P-value     | Partial R <sup>2</sup> |      |
| Frontal           | Pars Opercularis                  | 0.06 (0.02)       | 0.006       | 0.51                   |      |
|                   | Medial Orbito-Frontal             | 0.06 (0.02)       | 0.002       | 0.63                   |      |
|                   | Lateral Orbito-Frontal            | 0.06 (0.02)       | 0.002       | 0.70                   |      |
|                   | Paracentral Lobule                | 0.05 (0.02)       | 0.04        | 0.28                   |      |
|                   | Pars Orbitalis                    | 0.05 (0.02)       | 0.03        | 0.31                   |      |
|                   | Precentral                        | 0.04 (0.02)       | 0.04        | 0.26                   |      |
|                   | Superior Frontal                  | 0.03 (0.02)       | 0.10        | 0.18                   |      |
|                   | Rostral Middle Frontal            | 0.03 (0.02)       | 0.11        | 0.17                   |      |
|                   | Frontal Pole                      | 0.04 (0.02)       | 0.16        | 0.13                   |      |
|                   | Caudal Middle Frontal             | 0.01 (0.02)       | 0.59        | 0.02                   |      |
|                   | Pars Triangularis                 | 0.00 (0.02)       | 0.97        | 0.00                   |      |
|                   | Parietal                          | Precuneus         | 0.08 (0.02) | <0.001                 | 1.31 |
|                   |                                   | Inferior Parietal | 0.06 (0.02) | 0.002                  | 0.67 |
| Posterior Central |                                   | 0.06 (0.02)       | 0.002       | 0.66                   |      |
| Superior Parietal |                                   | 0.05 (0.02)       | 0.009       | 0.47                   |      |
| Supramarginal     |                                   | 0.02 (0.02)       | 0.21        | 0.10                   |      |
| Temporal          | Hippocampus                       | 0.08 (0.02)       | <0.001      | 0.85                   |      |
|                   | Amygdala                          | 0.07 (0.02)       | 0.002       | 0.67                   |      |
|                   | Inferior Temporal                 | 0.06 (0.02)       | 0.002       | 0.71                   |      |
|                   | Fusiform                          | 0.05 (0.02)       | 0.007       | 0.50                   |      |
|                   | Superior Temporal                 | 0.05 (0.02)       | 0.02        | 0.40                   |      |
|                   | Transverse Temporal               | 0.05 (0.02)       | 0.04        | 0.30                   |      |
|                   | Middle Temporal                   | 0.04 (0.02)       | 0.04        | 0.29                   |      |
|                   | Bank Sup Temp Sulcus <sup>b</sup> | 0.03 (0.02)       | 0.22        | 0.10                   |      |
|                   | Entorhinal cortex                 | 0.04 (0.02)       | 0.10        | 0.18                   |      |
|                   | Parahippocampal gyrus             | 0.02 (0.02)       | 0.42        | 0.04                   |      |
| Temporal Pole     | 0.01 (0.02)                       | 0.59              | 0.02        |                        |      |
| Occipital         | Lateral Occipital                 | 0.04 (0.02)       | 0.03        | 0.31                   |      |
|                   | Cuneus Cortex                     | 0.01 (0.02)       | 0.70        | 0.01                   |      |
|                   | Pericalcarine                     | 0.01 (0.02)       | 0.70        | 0.01                   |      |
|                   | Lingual                           | 0.00 (0.02)       | 0.83        | 0.00                   |      |
| Insular cortex    |                                   | 0.04 (0.02)       | 0.02        | 0.35                   |      |
| Cingulate         | Posterior Cingulate               | 0.06 (0.02)       | 0.002       | 0.67                   |      |
|                   | Rostral Anterior                  | 0.05 (0.02)       | 0.01        | 0.42                   |      |
|                   | Caudal Anterior                   | 0.04 (0.02)       | 0.06        | 0.23                   |      |
|                   | Isthmus of Cingulate              | 0.04 (0.02)       | 0.04        | 0.26                   |      |

|                            |                      |              |        |      |
|----------------------------|----------------------|--------------|--------|------|
| Deep Nuclei                | Thalamus             | 0.07 (0.02)  | <0.001 | 1.02 |
|                            | Ventral Diencephalon | 0.05 (0.02)  | 0.004  | 0.57 |
|                            | Caudate              | 0.04 (0.02)  | 0.08   | 0.20 |
|                            | Nucleus Accumbens    | 0.04 (0.02)  | 0.12   | 0.16 |
|                            | Putamen              | 0.03 (0.02)  | 0.14   | 0.14 |
|                            | Pallidum             | 0.02 (0.02)  | 0.33   | 0.06 |
| Cerebellum                 | White Matter         | 0.05 (0.02)  | 0.04   | 0.27 |
|                            | Cortex               | 0.02 (0.02)  | 0.39   | 0.05 |
| Cerebrum                   | White Matter         | 0.04 (0.01)  | 0.004  | 0.56 |
|                            | Cortex               | 0.06 (0.02)  | <0.001 | 0.91 |
| Inferior Lateral Ventricle |                      | -0.06 (0.02) | 0.02   | 0.36 |
| Lateral Ventricle          |                      | -0.03 (0.02) | 0.14   | 0.14 |

<sup>a</sup>Covariates in the multivariable model include age, sex, race/ethnicity, telomere length, total cranial volume, body mass index, systolic blood pressure, diabetes mellitus and smoking status. The effect size of telomere length (beta) is reported as the mean difference in each regional brain size associated with a 1-SD unit difference in telomere length. *P* values have been corrected for multiple comparisons.

<sup>b</sup>FreeSurfer (<http://surfer.nmr.mgh.harvard.edu/>) term for the banks of the superior temporal sulcus.

**eTable 4. Association of Subsegmental Brain Region Size with Telomere Length After Adjustment for APOE Genotype in Addition to Other Covariates<sup>a</sup>**

|                   |                        | Model +<br>APO ε2 |                | Model +<br>APO ε3 |                | Model +<br>APO ε4 |                |
|-------------------|------------------------|-------------------|----------------|-------------------|----------------|-------------------|----------------|
|                   |                        | (n=1372)          |                | (n=1372)          |                | (n=1372)          |                |
| Brain Region      | Subsegmental Region    | Beta (SE)         | P-value        | Beta (SE)         | P-value        | Beta (SE)         | P-value        |
| Frontal           | Pars Opercularis       | 0.04<br>(0.02)    | 0.12           | 0.04<br>(0.02)    | 0.12           | 0.04<br>(0.02)    | 0.12           |
|                   | Medial Orbito-Frontal  | 0.07<br>(0.02)    | 0.005          | 0.07<br>(0.02)    | 0.005          | 0.07<br>(0.02)    | 0.005          |
|                   | Lateral Orbito-Frontal | 0.08<br>(0.02)    | <0.001         | 0.08<br>(0.02)    | <0.001         | 0.08<br>(0.02)    | <0.001         |
|                   | Paracentral Lobule     | 0.05<br>(0.02)    | 0.05           | 0.05<br>(0.02)    | 0.05           | 0.05<br>(0.02)    | 0.05           |
|                   | Pars Orbitalis         | 0.07<br>(0.02)    | 0.005          | 0.07<br>(0.02)    | 0.005          | 0.07<br>(0.02)    | 0.005          |
|                   | Precentral             | 0.05<br>(0.02)    | 0.02           | 0.05<br>(0.02)    | 0.02           | 0.05<br>(0.02)    | 0.02           |
|                   | Superior Frontal       | 0.05<br>(0.02)    | 0.01           | 0.05<br>(0.02)    | 0.01           | 0.05<br>(0.02)    | 0.01           |
|                   | Rostral Middle Frontal | 0.06<br>(0.02)    | 0.007          | 0.06<br>(0.02)    | 0.007          | 0.06<br>(0.02)    | 0.007          |
|                   | Frontal Pole           | 0.01<br>(0.03)    | 0.83           | 0.01<br>(0.03)    | 0.83           | 0.01<br>(0.03)    | 0.84           |
|                   | Caudal Middle Frontal  | 0.03<br>(0.02)    | 0.22           | 0.03<br>(0.02)    | 0.22           | 0.03<br>(0.02)    | 0.22           |
| Parietal          | Pars Triangularis      | 0.02<br>(0.02)    | 0.50           | 0.02<br>(0.02)    | 0.49           | 0.02<br>(0.02)    | 0.49           |
|                   | Precuneus              | 0.09<br>(0.02)    | <0.001         | 0.09<br>(0.02)    | <0.001         | 0.09<br>(0.02)    | <0.001         |
|                   | Inferior Parietal      | 0.06<br>(0.02)    | 0.007          | 0.06<br>(0.02)    | 0.007          | 0.06<br>(0.02)    | 0.007          |
|                   | Posterior Central      | 0.08<br>(0.02)    | <0.001         | 0.08<br>(0.02)    | <0.001         | 0.08<br>(0.02)    | <0.001         |
|                   | Superior Parietal      | 0.06<br>(0.02)    | 0.02           | 0.06<br>(0.02)    | 0.02           | 0.06<br>(0.02)    | 0.02           |
|                   | Supramarginal          | 0.05<br>(0.02)    | 0.03           | 0.05<br>(0.02)    | 0.03           | 0.05<br>(0.02)    | 0.03           |
|                   | Temporal               | Hippocampus       | 0.12<br>(0.02) | <0.001            | 0.12<br>(0.02) | <0.001            | 0.12<br>(0.02) |
| Amygdala          |                        | 0.11<br>(0.02)    | <0.001         | 0.11<br>(0.02)    | <0.001         | 0.11<br>(0.02)    | <0.001         |
| Inferior Temporal |                        | 0.08<br>(0.02)    | <0.001         | 0.08<br>(0.02)    | <0.001         | 0.08<br>(0.02)    | <0.001         |

|                |                                   |                |        |                |        |                |        |
|----------------|-----------------------------------|----------------|--------|----------------|--------|----------------|--------|
|                | Fusiform                          | 0.06<br>(0.02) | 0.005  | 0.06<br>(0.02) | 0.005  | 0.06<br>(0.02) | 0.005  |
|                | Superior Temporal                 | 0.08<br>(0.02) | <0.001 | 0.08<br>(0.02) | <0.001 | 0.08<br>(0.02) | <0.001 |
|                | Transverse Temporal               | 0.05<br>(0.02) | 0.03   | 0.05<br>(0.02) | 0.03   | 0.05<br>(0.02) | 0.03   |
|                | Middle Temporal                   | 0.05<br>(0.02) | 0.02   | 0.05<br>(0.02) | 0.02   | 0.05<br>(0.02) | 0.02   |
|                | Bank Sup Temp Sulcus <sup>b</sup> | 0.06<br>(0.02) | 0.02   | 0.06<br>(0.02) | 0.02   | 0.06<br>(0.02) | 0.02   |
|                | Entorhinal cortex                 | 0.06<br>(0.02) | 0.02   | 0.06<br>(0.02) | 0.02   | 0.06<br>(0.02) | 0.02   |
|                | Parahippocampal gyrus             | 0.03<br>(0.02) | 0.19   | 0.03<br>(0.02) | 0.19   | 0.03<br>(0.02) | 0.19   |
|                | Temporal Pole                     | 0.04<br>(0.03) | 0.11   | 0.05<br>(0.03) | 0.11   | 0.05<br>(0.03) | 0.11   |
| Occipital      | Lateral Occipital                 | 0.03<br>(0.02) | 0.13   | 0.03<br>(0.02) | 0.13   | 0.03<br>(0.02) | 0.13   |
|                | Cuneus Cortex                     | 0.02<br>(0.02) | 0.41   | 0.02<br>(0.02) | 0.42   | 0.02<br>(0.02) | 0.42   |
|                | Pericalcarine                     | 0.03<br>(0.02) | 0.30   | 0.03<br>(0.02) | 0.31   | 0.03<br>(0.02) | 0.31   |
|                | Lingual                           | 0.02<br>(0.02) | 0.41   | 0.02<br>(0.02) | 0.42   | 0.02<br>(0.02) | 0.42   |
| Insular cortex |                                   | 0.06<br>(0.02) | 0.004  | 0.06<br>(0.02) | 0.004  | 0.06<br>(0.02) | 0.004  |
| Cingulate      | Posterior Cingulate               | 0.09<br>(0.02) | <0.001 | 0.09<br>(0.02) | <0.001 | 0.09<br>(0.02) | <0.001 |
|                | Rostral Anterior                  | 0.06<br>(0.02) | 0.01   | 0.06<br>(0.02) | 0.01   | 0.06<br>(0.02) | 0.01   |
|                | Caudal Anterior                   | 0.04<br>(0.02) | 0.11   | 0.04<br>(0.02) | 0.11   | 0.04<br>(0.02) | 0.11   |
|                | Isthmus of Cingulate              | 0.06<br>(0.02) | 0.02   | 0.06<br>(0.02) | 0.02   | 0.06<br>(0.02) | 0.02   |
| Deep Nuclei    | Thalamus                          | 0.09<br>(0.02) | <0.001 | 0.09<br>(0.02) | <0.001 | 0.09<br>(0.02) | <0.001 |
|                | Ventral Diencephalon              | 0.08<br>(0.02) | <0.001 | 0.08<br>(0.02) | <0.001 | 0.08<br>(0.02) | <0.001 |
|                | Caudate                           | 0.05<br>(0.02) | 0.03   | 0.05<br>(0.02) | 0.03   | 0.05<br>(0.02) | 0.03   |
|                | Nucleus Accumbens                 | 0.06<br>(0.02) | 0.03   | 0.06<br>(0.02) | 0.03   | 0.06<br>(0.02) | 0.03   |
|                | Putamen                           | 0.05<br>(0.02) | 0.03   | 0.05<br>(0.02) | 0.03   | 0.05<br>(0.02) | 0.03   |
|                | Pallidum                          | 0.04<br>(0.02) | 0.06   | 0.04<br>(0.02) | 0.06   | 0.04<br>(0.02) | 0.06   |

|                                  |              |                 |        |                 |        |                 |        |
|----------------------------------|--------------|-----------------|--------|-----------------|--------|-----------------|--------|
| Cerebellum                       | White Matter | 0.03<br>(0.02)  | 0.24   | 0.03<br>(0.02)  | 0.24   | 0.03<br>(0.02)  | 0.24   |
|                                  | Cortex       | 0.03<br>(0.02)  | 0.22   | 0.03<br>(0.02)  | 0.22   | 0.03<br>(0.02)  | 0.22   |
| Cerebrum                         | White Matter | 0.05<br>(0.01)  | 0.004  | 0.05<br>(0.01)  | 0.004  | 0.05<br>(0.01)  | 0.004  |
|                                  | Cortex       | 0.09<br>(0.02)  | <0.001 | 0.09<br>(0.02)  | <0.001 | 0.09<br>(0.02)  | <0.001 |
| Inferior<br>Lateral<br>Ventricle |              | -0.08<br>(0.03) | 0.005  | -0.08<br>(0.03) | 0.005  | -0.08<br>(0.03) | 0.005  |
| Lateral<br>Ventricle             |              | -0.06<br>(0.02) | 0.03   | -0.06<br>(0.02) | 0.03   | -0.06<br>(0.02) | 0.03   |

<sup>a</sup>Covariates in the multivariable models include age, sex, race/ethnicity, telomere length, total cranial volume, body mass index, systolic blood pressure, diabetes mellitus, smoking status and one of three different *APOE* genotypes ( $\epsilon$ 2,  $\epsilon$ 3 or  $\epsilon$ 4). The effect size of telomere (beta) is reported as the mean difference in each regional brain size associated with a 1-SD unit difference in telomere length. *P* values have been corrected for multiple comparisons.

<sup>b</sup>FreeSurfer (<http://surfer.nmr.mgh.harvard.edu/>) term for the banks of the superior temporal sulcus.
